# Supplementary material for: Complement biomarkers reflect the pathological status of neuromyelitis optica spectrum disorders
Source: PubMed Central journal article supplement (PMC10020620; doi:10.3389/fimmu.2023.1090548), 2023-03-03
Supplement: DataSheet_1.pdf [file DataSheet_1.pdf]

## Supplementary Material

Supplementary Figure 1.

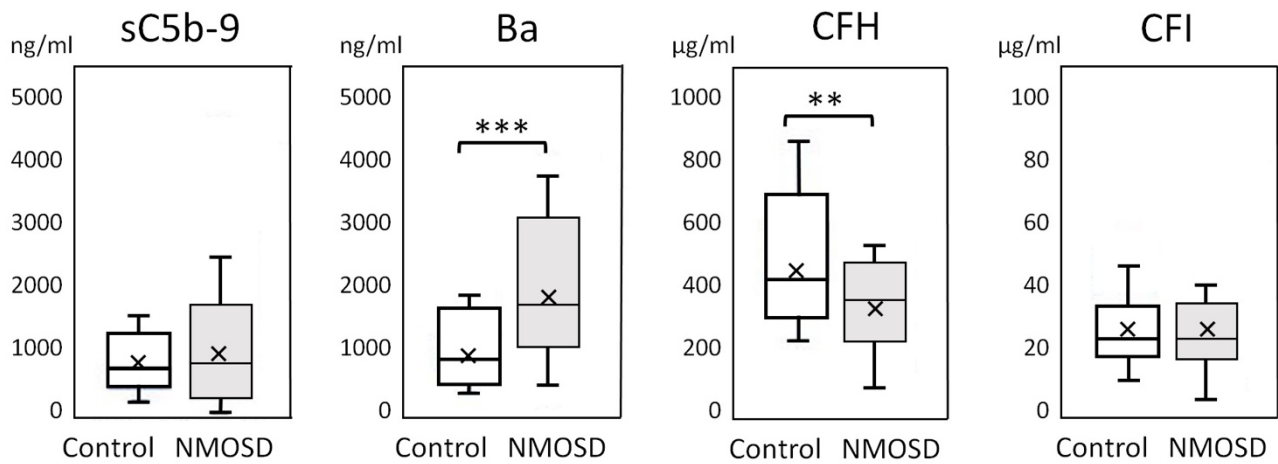

### Serum levels of complement markers of the acute phase in 10 naïve patients with neuromyelitis optica spectrum disorders

Serum levels of sC5b-9, Ba, complement factor H (CFH), and complement factor I (CFI) in the acute phases of 10 patients that had not received any treatment at the time of the first-episode of neuromyelitis optica spectrum disorders, together with those of healthy controls, are shown by box plots.

\*\* $p < 0.01$ , and \*\*\* $p < 0.001$ , Student t-test.

## Supplementary Figure 2.

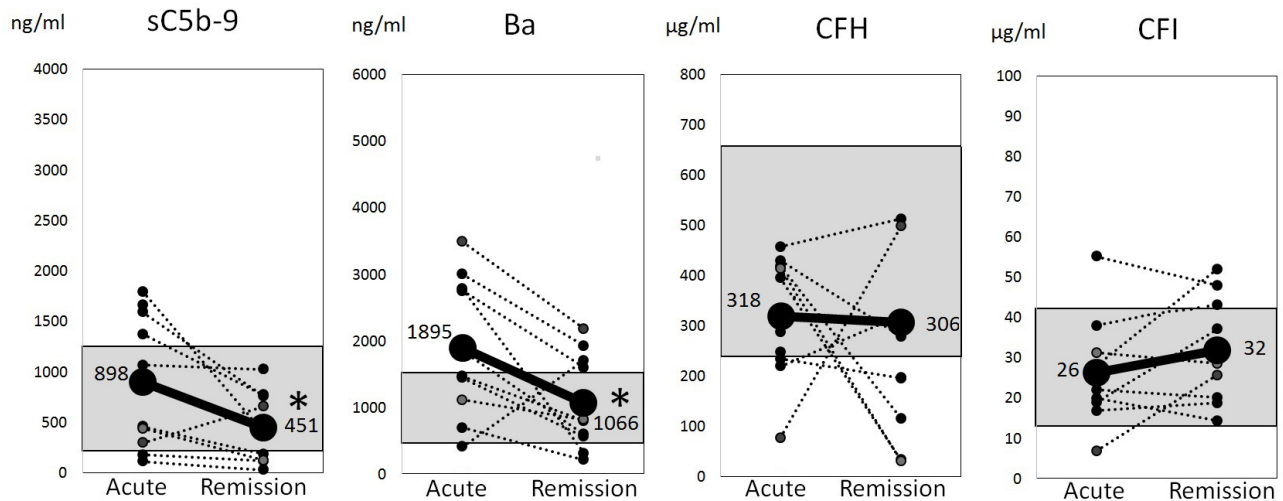

### Changes of complement markers during the acute and remission phases of 10 naïve patients with neuromyelitis optica spectrum disorders

Changes of serum levels of sC5b-9, Ba, complement factor H (CFH) and complement factor I (CFI) during the acute and remission phases of 10 patients that had not received any treatment at the time of the first-episode of neuromyelitis optica spectrum disorders were analyzed. The dotted lines indicate changes in individual cases, and solid lines indicate changes in average levels. The gray shadow indicates reference ranges in Japanese healthy adults (sC5b-9: 181–1266 ng/ml, Ba: 438–1546 ng/ml, CFH: 238–663 µg/ml, CFI: 11–42 µg/ml) (15).

\* $p < 0.01$ , paired t-test.

**Supplementary Table 1. Laboratory Data and Treatments in NMOSD-naïve patients**

|                                | Acute phase   | Remission     | <i>p</i> -values |
|--------------------------------|---------------|---------------|------------------|
| Blood Tests                    |               |               |                  |
| White Blood Cells (/μL)        | 7535 ± 2320   | 7492 ± 3819   | 0.991            |
| Neutrophils (/μL)              | 5203 ± 2089   | 4224 ± 1582   | 0.698            |
| Lymphocytes (/μL)              | 1582 ± 729    | 2561 ± 1976   | 0.420            |
| Monocytes (/μL)                | 580 ± 471     | 529 ± 238     | 0.873            |
| Albumin (g/dL)                 | 4.2 ± 0.4     | 3.8 ± 0.4     | 0.865            |
| CRP (mg/dL)                    | 0.600 ± 0.861 | 0.339 ± 0.685 | 0.538            |
| Cerebrospinal fluid test       |               |               |                  |
| Cell count (/mm <sup>3</sup> ) | 22.9 ± 40.4   | 2.9 ± 3.7     | 0.246            |
| Protein (mg/dL)                | 40.9 ± 14.4   | 31.4 ± 5.6    | 0.654            |
| Treatments at blood collection |               |               |                  |
| None                           | 10 (100%)     | 5 (50.0%)     |                  |
| Steroids                       | 0 (0.0%)      | 3 (30.0%)     |                  |
| Immunosuppressants             | 0 (0.0%)      | 1 (10.0%)     |                  |
| Steroids + Immunosuppressants  | 0 (0.0%)      | 1 (10.0%)     |                  |
| Plasma exchange                | 0 (0.0%)      | 0 (0.0%)      |                  |

Data are shown as mean ± standard deviation. Abbreviations: CRP = C-reactive protein; NMOSD = neuromyelitis optica spectrum disorders.

**Supplementary Table 2. Correlations between serum complement marker levels and clinical data in the acute phase of NMOSD**

|                   | sC5b-9 | Ba     | CFH    | CFI          |
|-------------------|--------|--------|--------|--------------|
| Age               | -0.175 | -0.167 | 0.036  | -0.008       |
| Disease duration  | 0.085  | -0.026 | -0.316 | <u>0.520</u> |
| EDSS              | 0.140  | -0.032 | -0.248 | 0.183        |
| White Blood Cells | 0.125  | 0.004  | 0.042  | 0.176        |
| Neutrophils       | 0.033  | 0.019  | -0.070 | 0.189        |
| Lymphocytes       | 0.033  | -0.096 | 0.259  | -0.013       |
| Monocytes         | 0.041  | -0.024 | 0.177  | 0.014        |
| Albumin           | 0.154  | 0.059  | -0.198 | 0.128        |
| CRP               | -0.040 | -0.001 | 0.399  | -0.396       |
| CSF cell count    | 0.104  | 0.180  | -0.074 | -0.179       |
| CSF protein       | -0.228 | -0.249 | -0.148 | 0.481        |

Data are shown as r value. Abbreviations: CSF=cerebrospinal fluid; NMOSD=neuromyelitis optica spectrum disorders; EDSS = expanded disability status scale. Underline: significant correlation
